# Supplementary material for: Transport properties of ionic liquid electrolytes with organic diluents
Source: Royal Society of Chemistry journal article supplement (doi:10.1039/b902200g), 2009-01-01
Supplement: b902200g.pdf [file b902200g.pdf]

**Electronic Supplementary Information**

| Sample          | Amount of IL [mol] | Amount of Diluent [mol] | Amount of IL + Diluent [mol] | Mass of IL + Diluent [g] | Density of IL + Diluent [g.cm3] | Volume of IL + Diluent [L] | Amount of LiNTf2 [mol] | Diluent : Li <sup>+</sup> Ratio |
|-----------------|--------------------|-------------------------|------------------------------|--------------------------|---------------------------------|----------------------------|------------------------|---------------------------------|
| <b>10 mol%:</b> |                    |                         |                              |                          |                                 |                            |                        |                                 |
| VC              | 0.9                | 0.1                     | 1                            | 376.15                   | 1.45                            | 0.26                       | 0.17                   | 0.59                            |
| EC              | 0.9                | 0.1                     | 1                            | 376.35                   | 1.45                            | 0.26                       | 0.17                   | 0.59                            |
| THF             | 0.9                | 0.1                     | 1                            | 374.75                   | 1.44                            | 0.26                       | 0.17                   | 0.59                            |
| Toluene         | 0.9                | 0.1                     | 1                            | 376.76                   | 1.44                            | 0.26                       | 0.17                   | 0.59                            |
| <b>20 mol%:</b> |                    |                         |                              |                          |                                 |                            |                        |                                 |
| VC              | 0.8                | 0.2                     | 1                            | 343.91                   | 1.44                            | 0.23                       | 0.15                   | 1.32                            |
| EC              | 0.8                | 0.2                     | 1                            | 344.32                   | 1.44                            | 0.23                       | 0.15                   | 1.32                            |
| THF             | 0.8                | 0.2                     | 1                            | 341.13                   | 1.43                            | 0.24                       | 0.15                   | 1.31                            |
| Toluene         | 0.8                | 0.2                     | 1                            | 345.13                   | 1.42                            | 0.24                       | 0.16                   | 1.28                            |

These calculations are based on the assumption that the density of the IL with diluent follows a linear law of mixtures.
